# Supplementary material for: A Biological Inventory of Prophages in A. baumannii Genomes Reveal Distinct Distributions in Classes, Length and Genomic Positions
Source: bioRxiv or medRxiv preprint supplement (doi:10.1101/2020.10.26.355222), 2020-10-26
Supplement: Supplementary file [file media-1.pdf]

Supplemental Figure S1

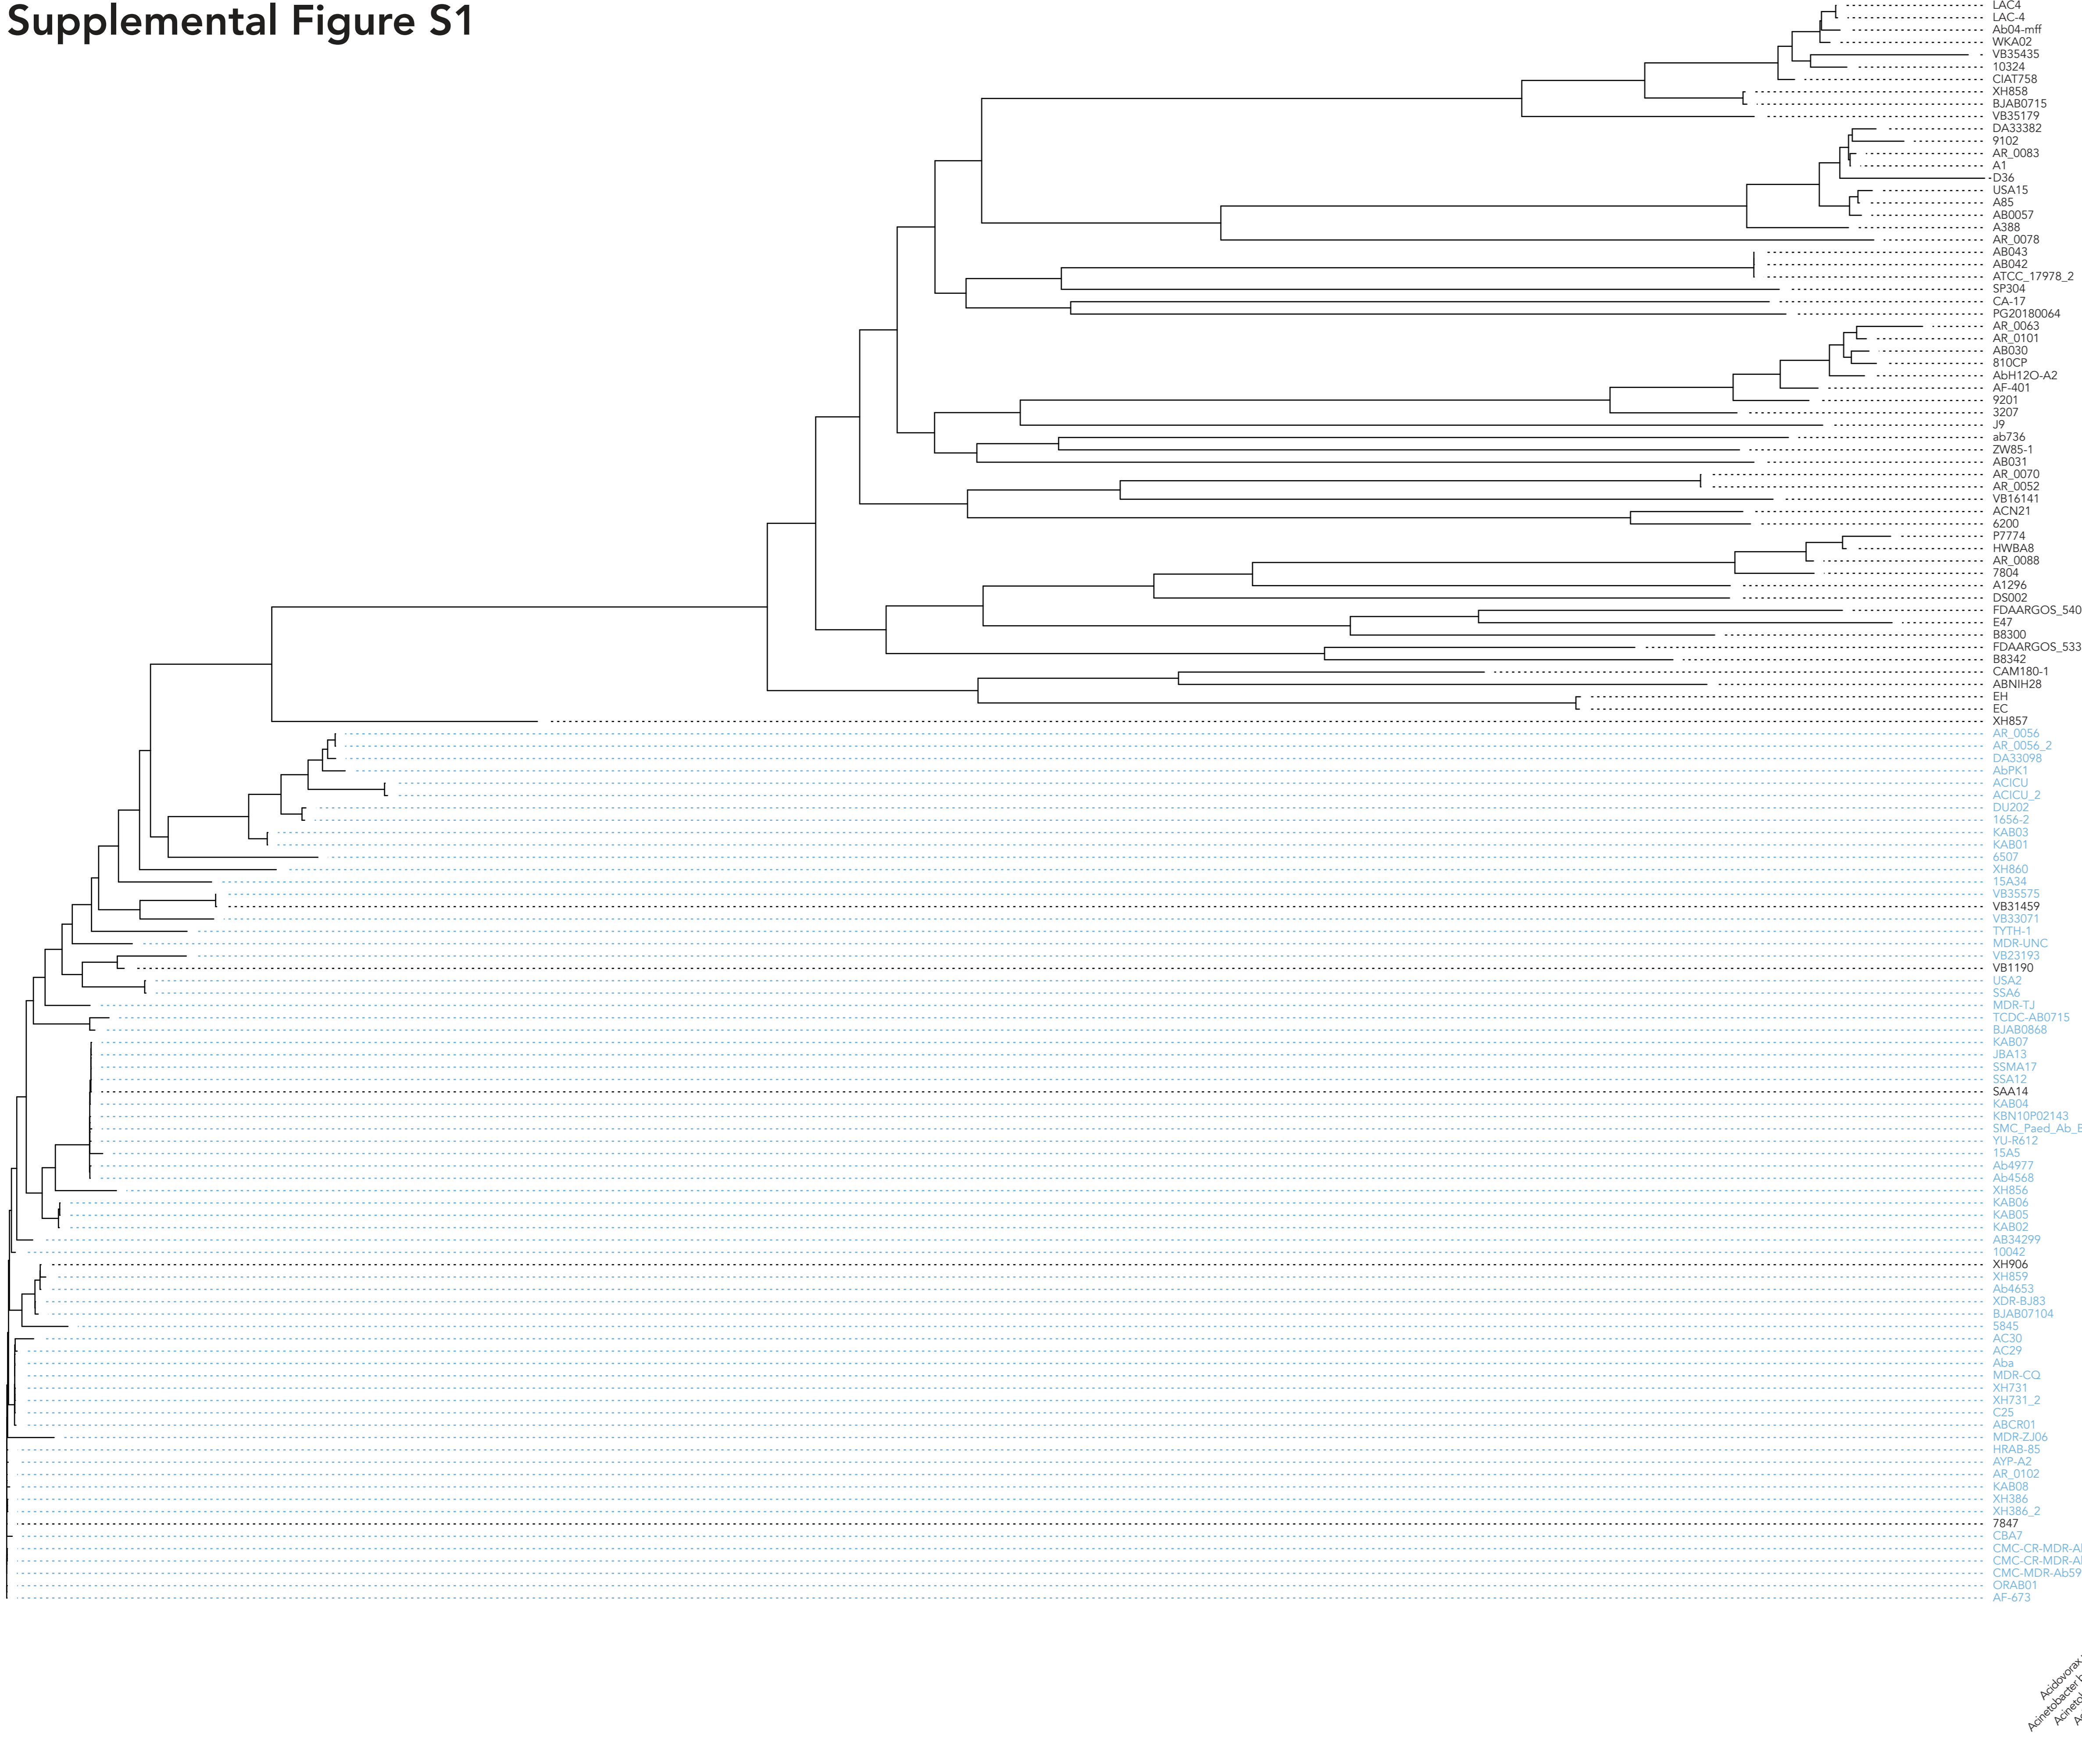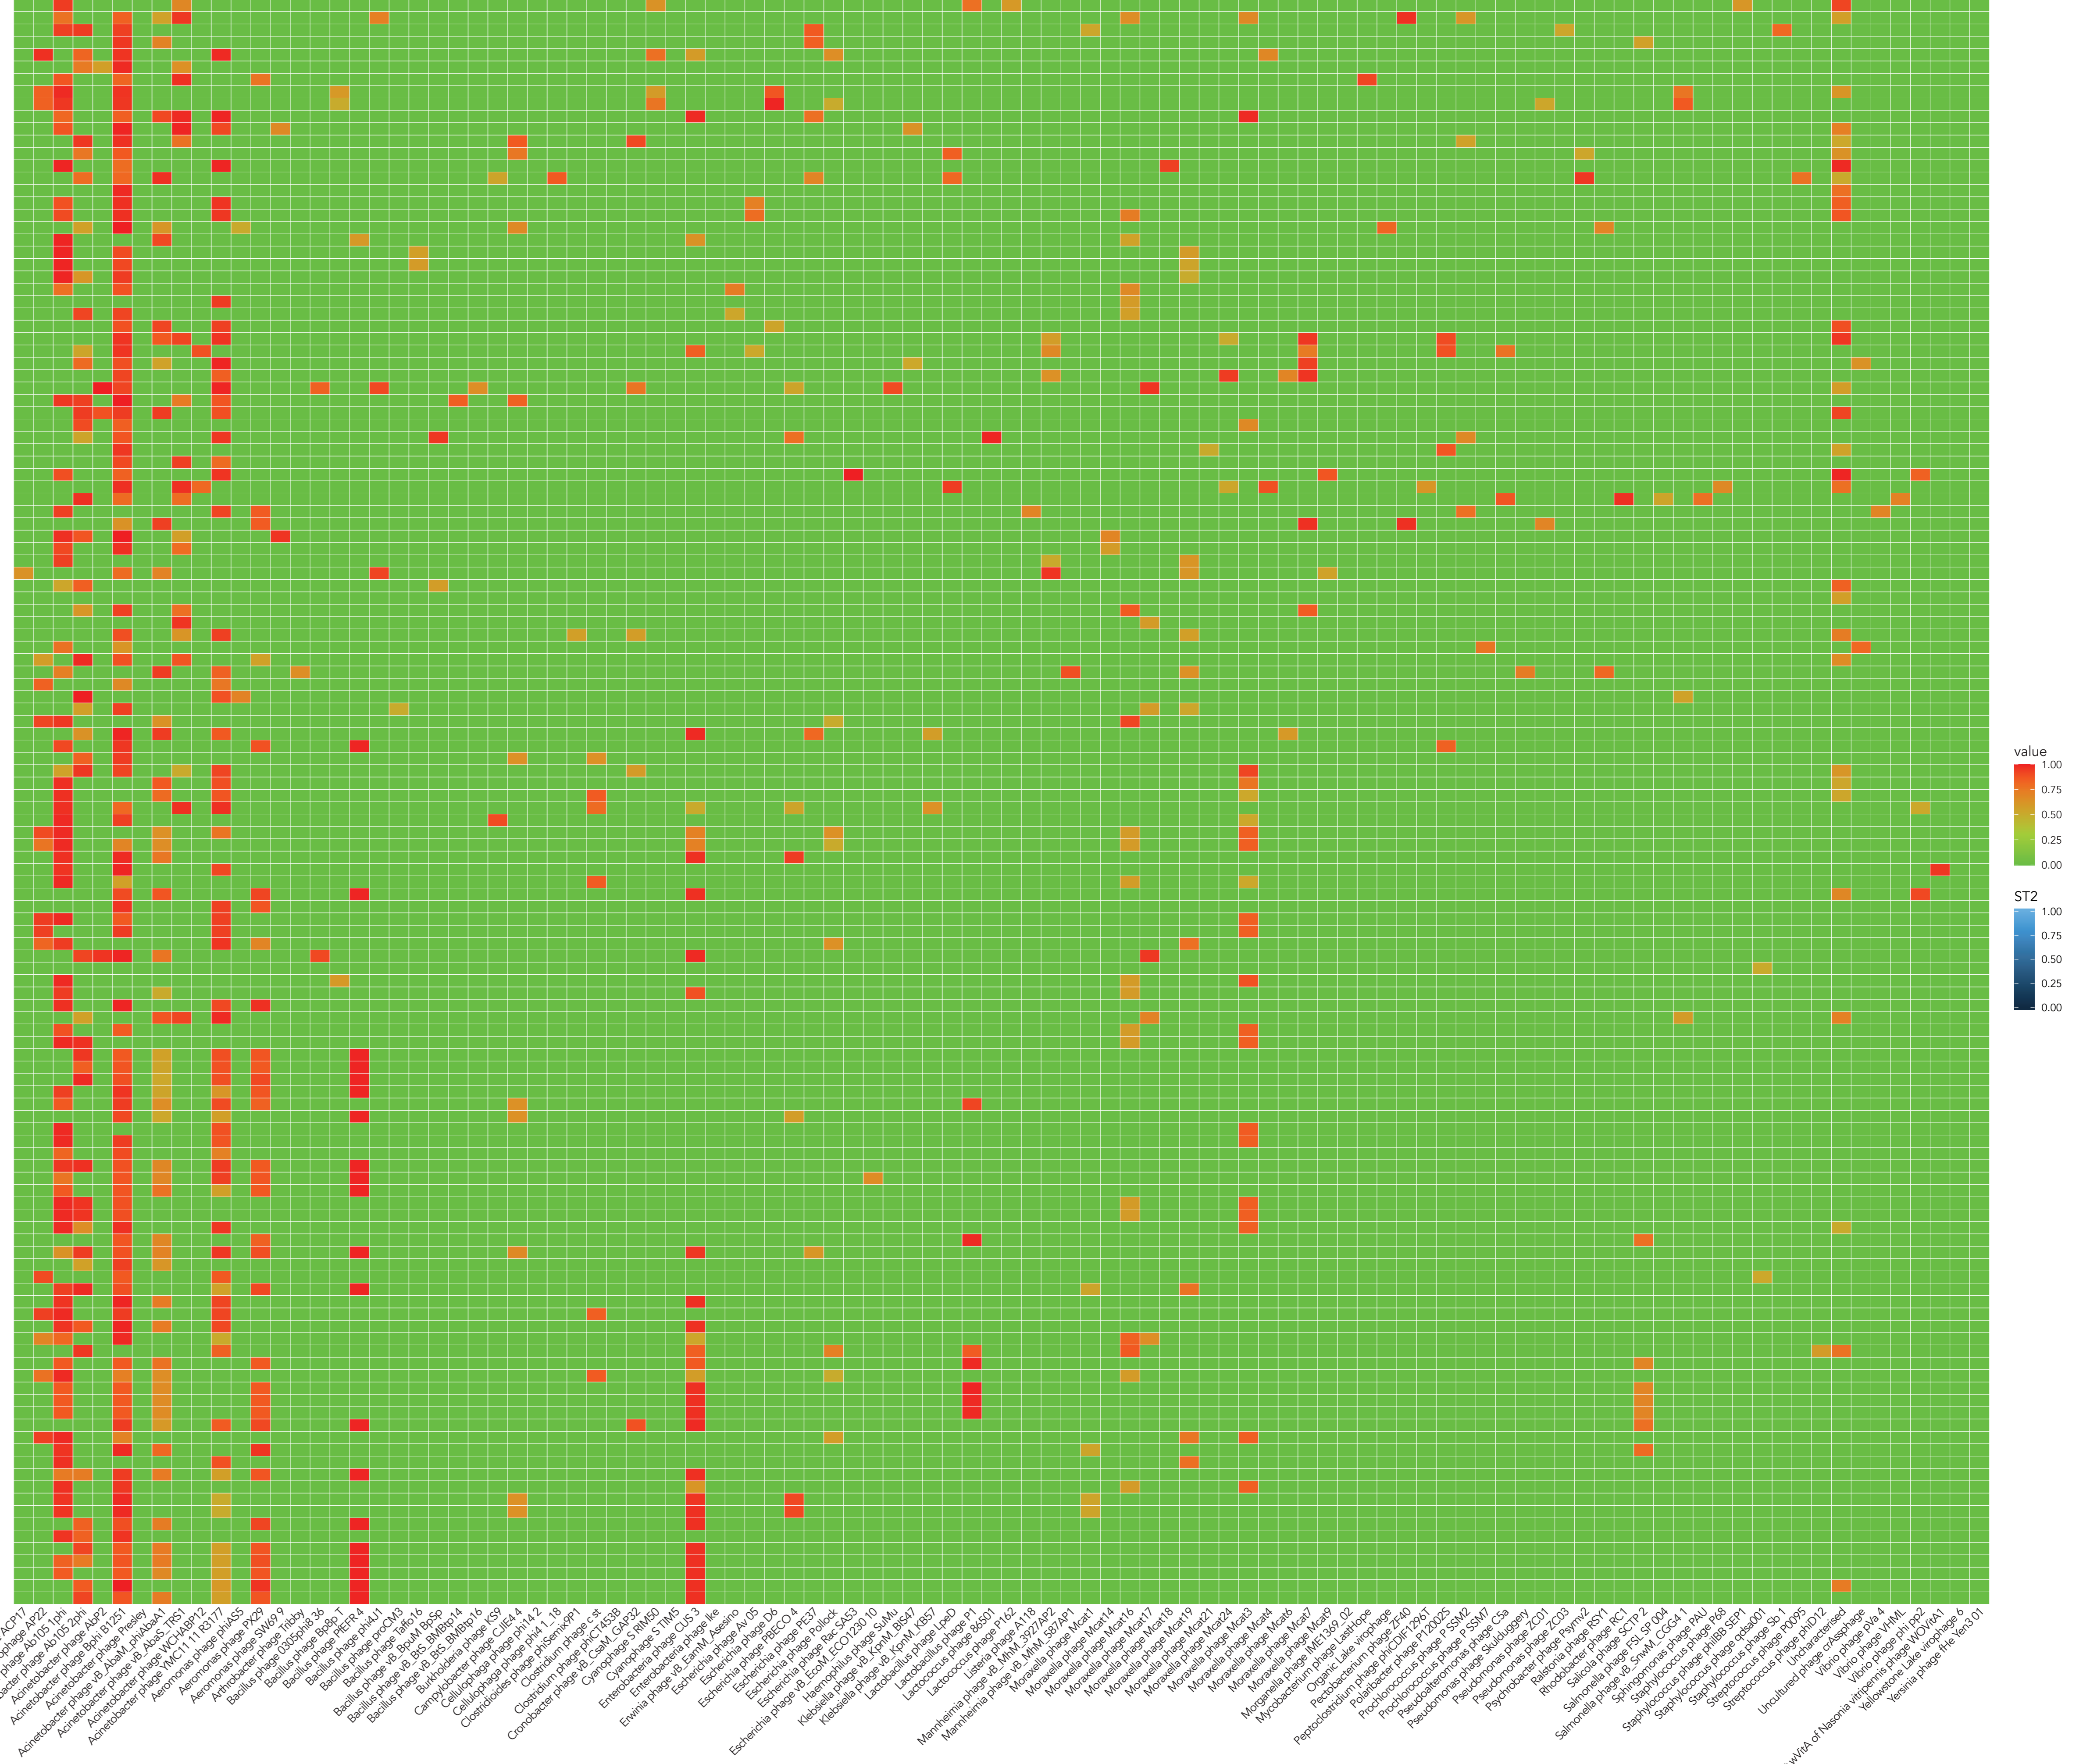

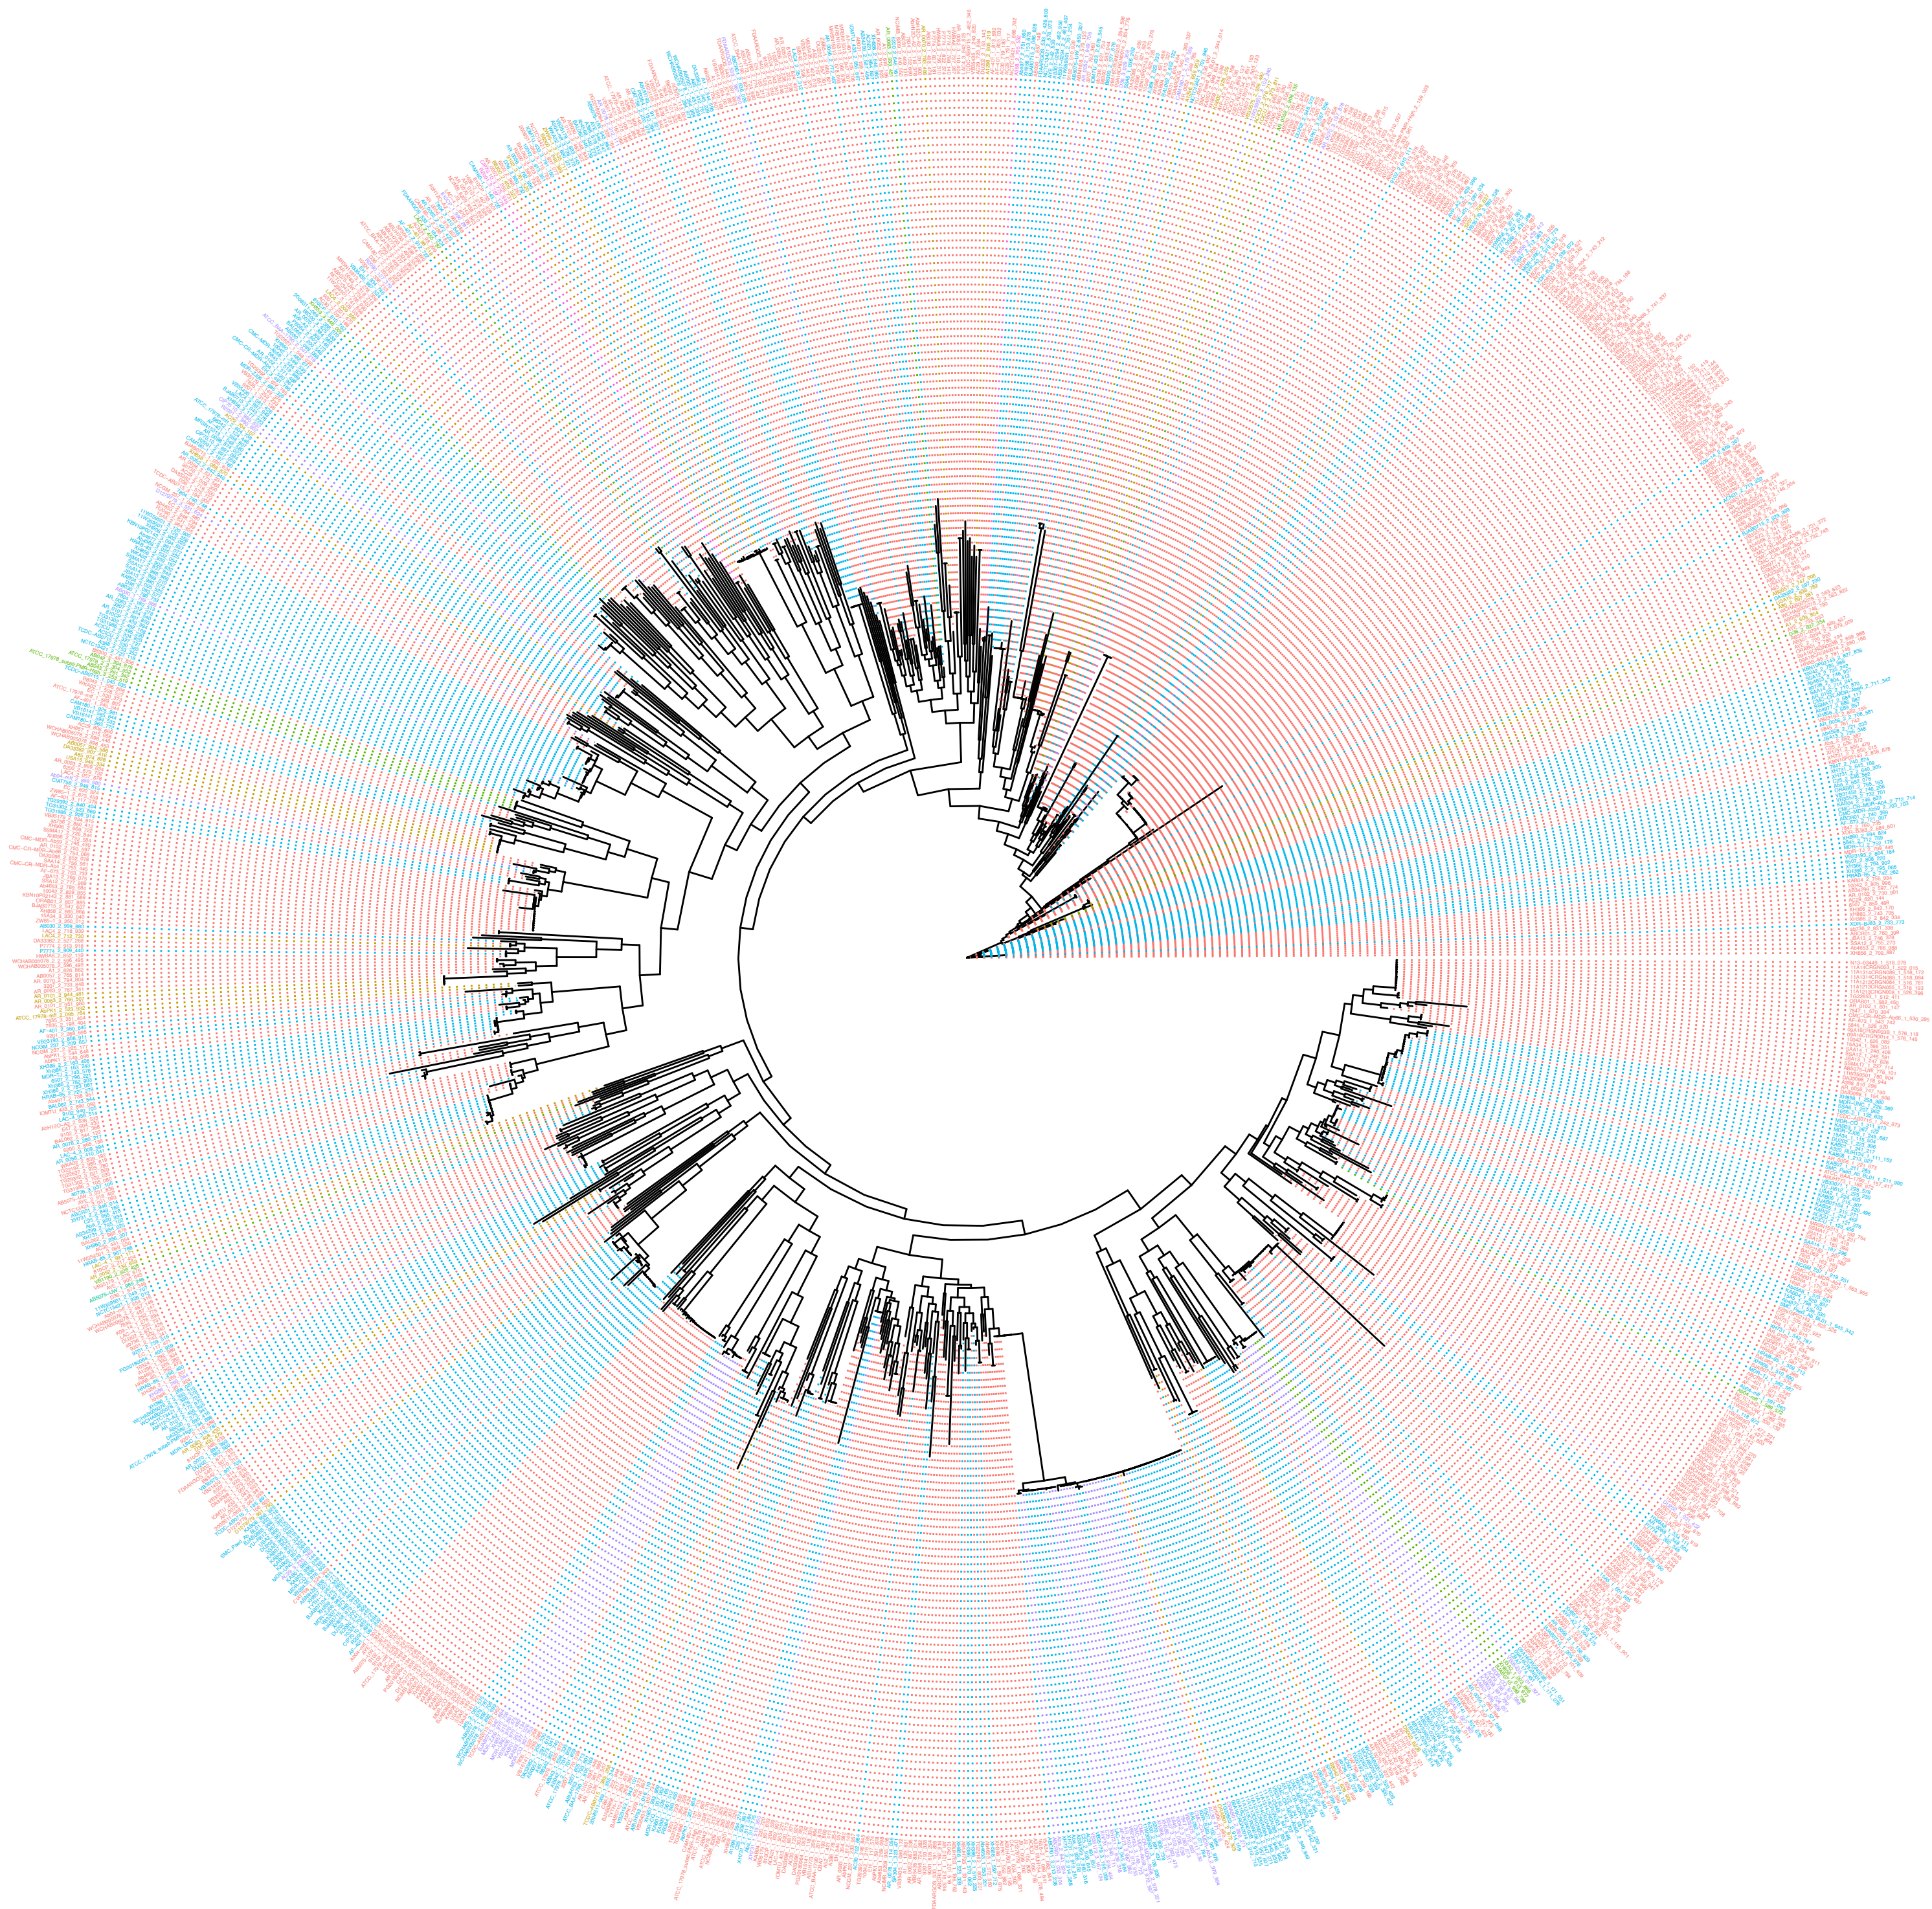

species

- Siphoviridae
- Uncharacterised
- Herelleviridae
- Lineavirus
- Myoviridae
- Podoviridae
- unclassified Lavidaviridae
